# Supplementary material for: Phosphorus-Doped Hollow Tubular g-C3N4 for Enhanced Photocatalytic CO2 Reduction
Source: MDPI journal article supplement (doi:10.3390/ma16206665), 2023-10-12
Supplement: s1 [file s1]

# Supporting Information

## Phosphorus-Doped Hollow Tubular g-C<sub>3</sub>N<sub>4</sub> for Enhanced Photocatalytic CO<sub>2</sub> Reduction

Manying Sun<sup>1</sup>, Chuanwei Zhu<sup>1</sup>, Su Wei<sup>1</sup>, Liuyun Chen<sup>1</sup>, Hongbing Ji<sup>1,2</sup>, Tongming Su<sup>1\*</sup>, Zuzeng Qin<sup>1\*</sup>

1. Guangxi Key Laboratory of Petrochemical Resource Processing and Process Intensification Technology,  
School of Chemistry and Chemical Engineering, Guangxi University, Nanning 530004, China
2. Fine Chemical Industry Research Institute, Sun Yat-sen University, Guangzhou 510275, China

\*Corresponding author:

E-mail: sutm@gxu.edu.cn (T. Su), qinzuzeng@gxu.edu.cn (Z. Qin)

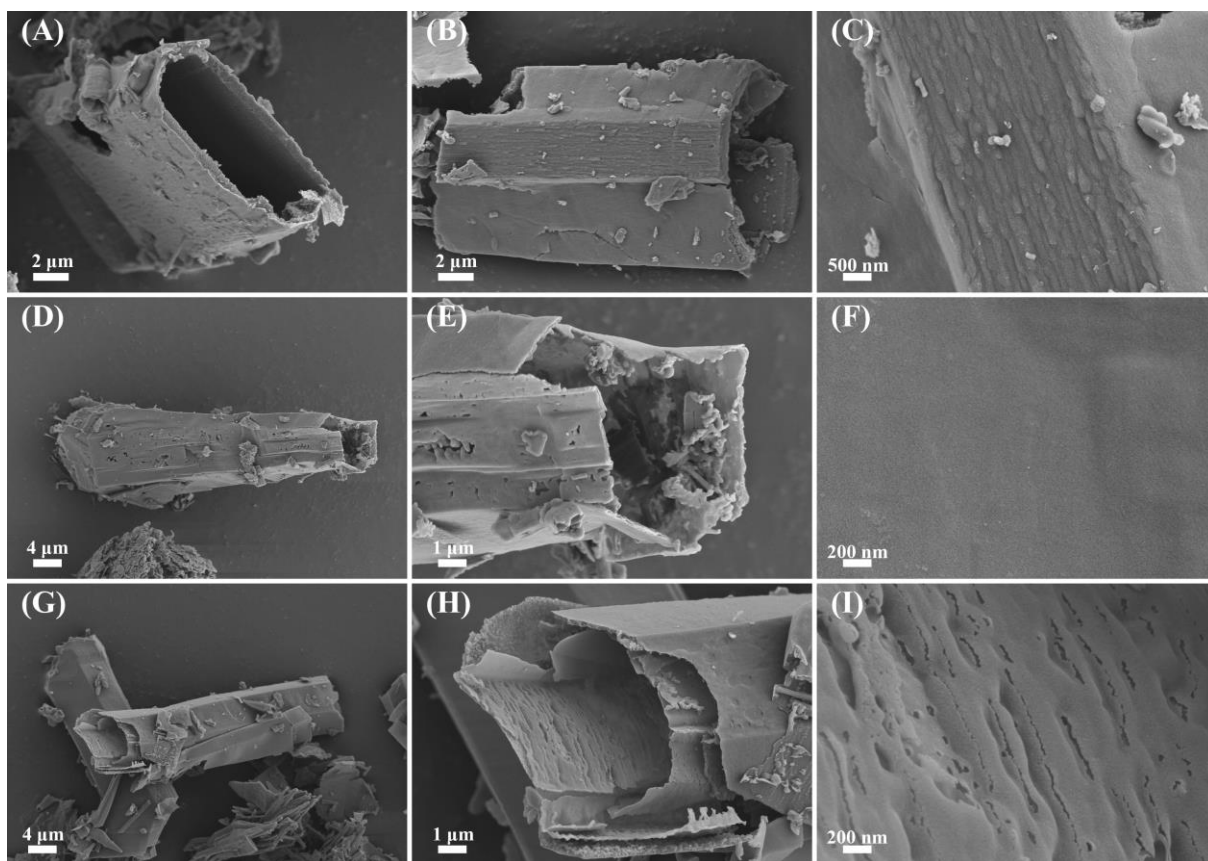

**Figure S1.** SEM images of 0.5-P-HCN (A, B, C), 1.5-P-HCN (D, E, F), and 2.0-P-HCN (G, H, I).

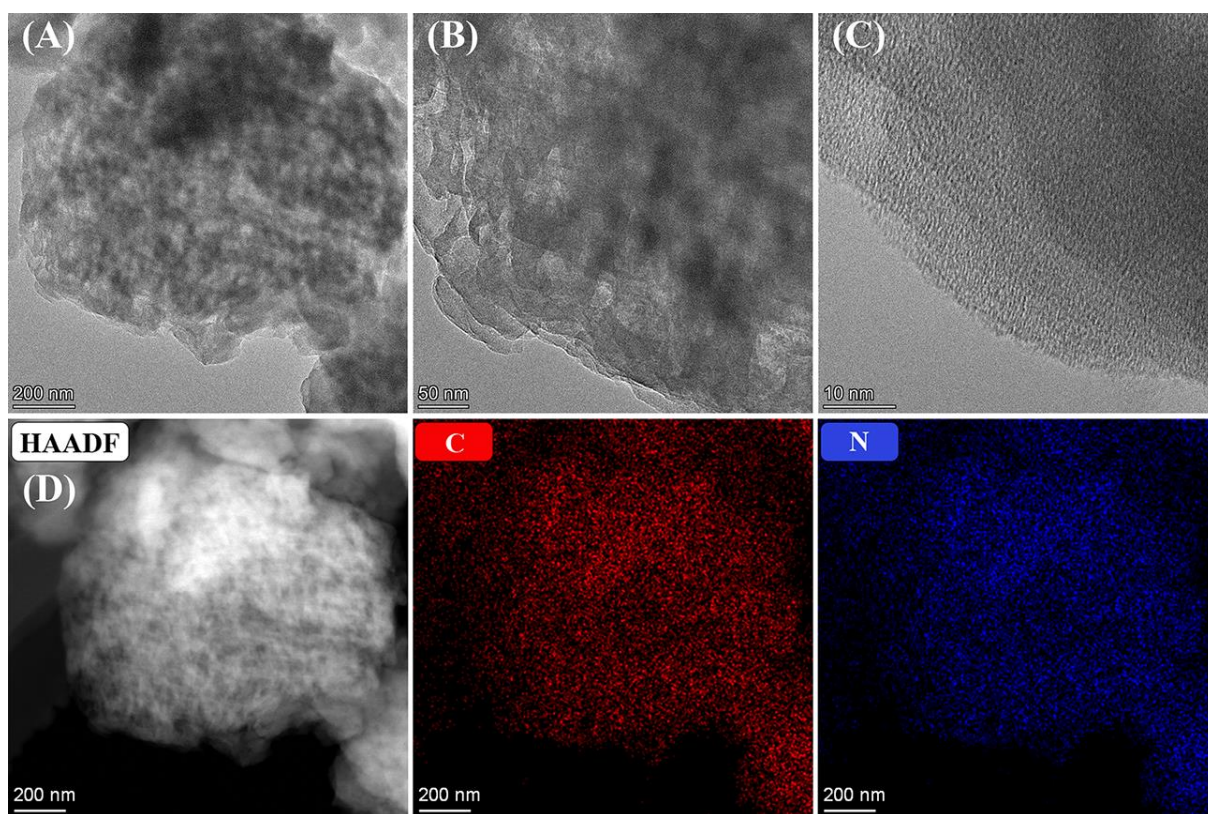

**Figure S2.** TEM images (A, B, C) and EDS elemental mapping (D) of g-C<sub>3</sub>N<sub>4</sub>.

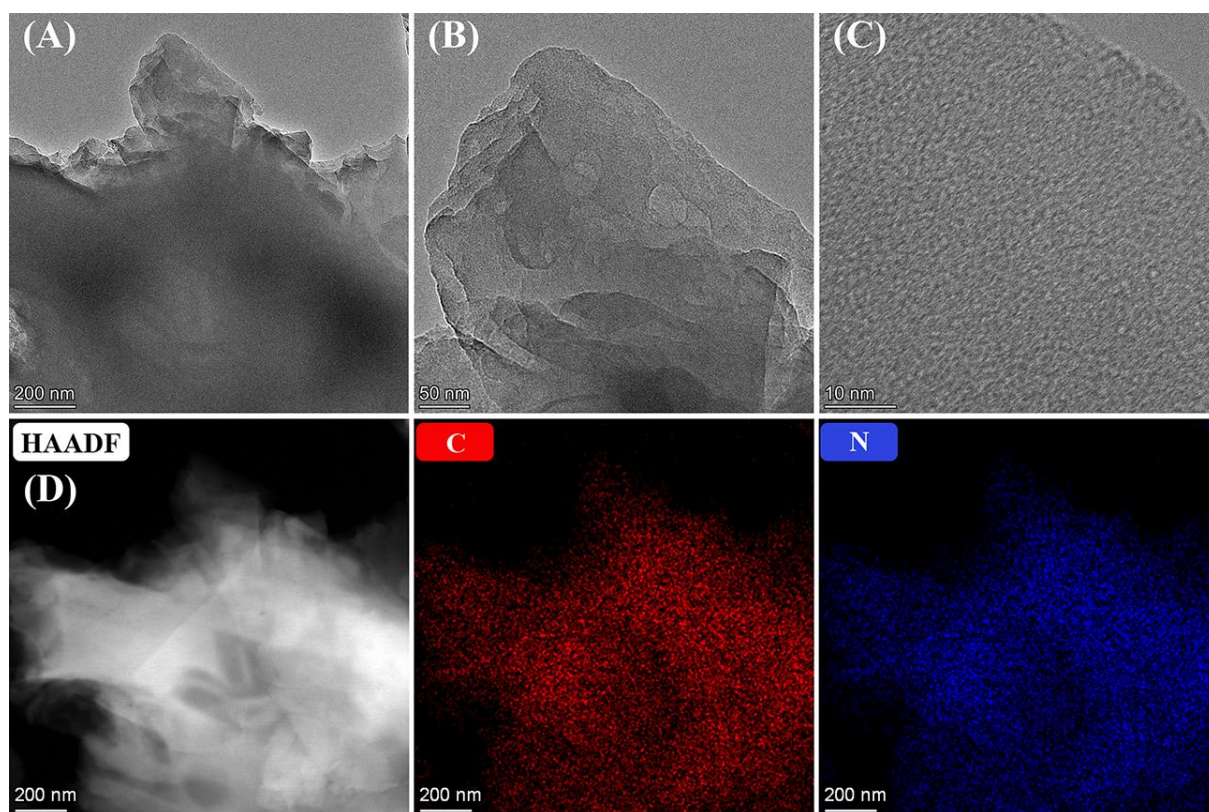

**Figure S3.** TEM images (A, B, C) and EDS elemental mapping (D) of HCN.

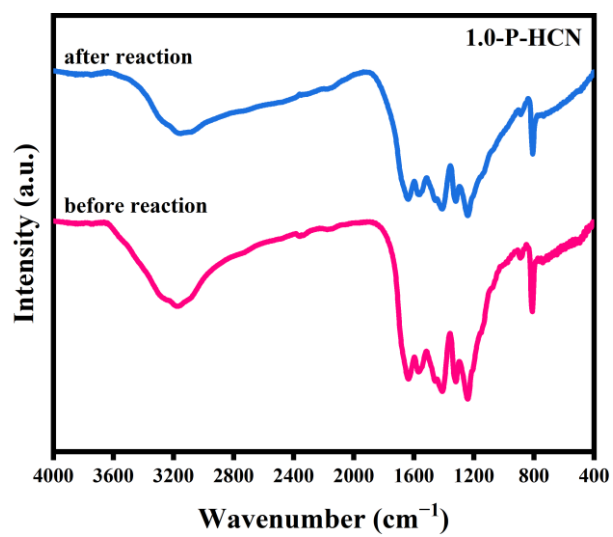

**Figure S4.** FT-IR spectra of 1.0-P-HCN before and after reaction for three cycles.

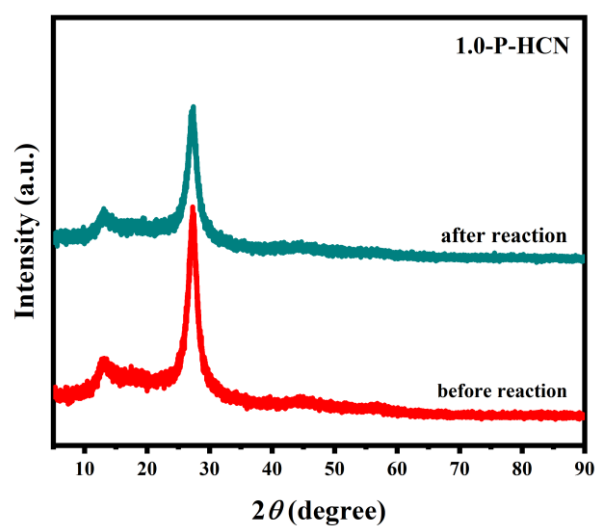

**Figure S5.** XRD patterns of 1.0-P-HCN before and after reaction for three cycles.

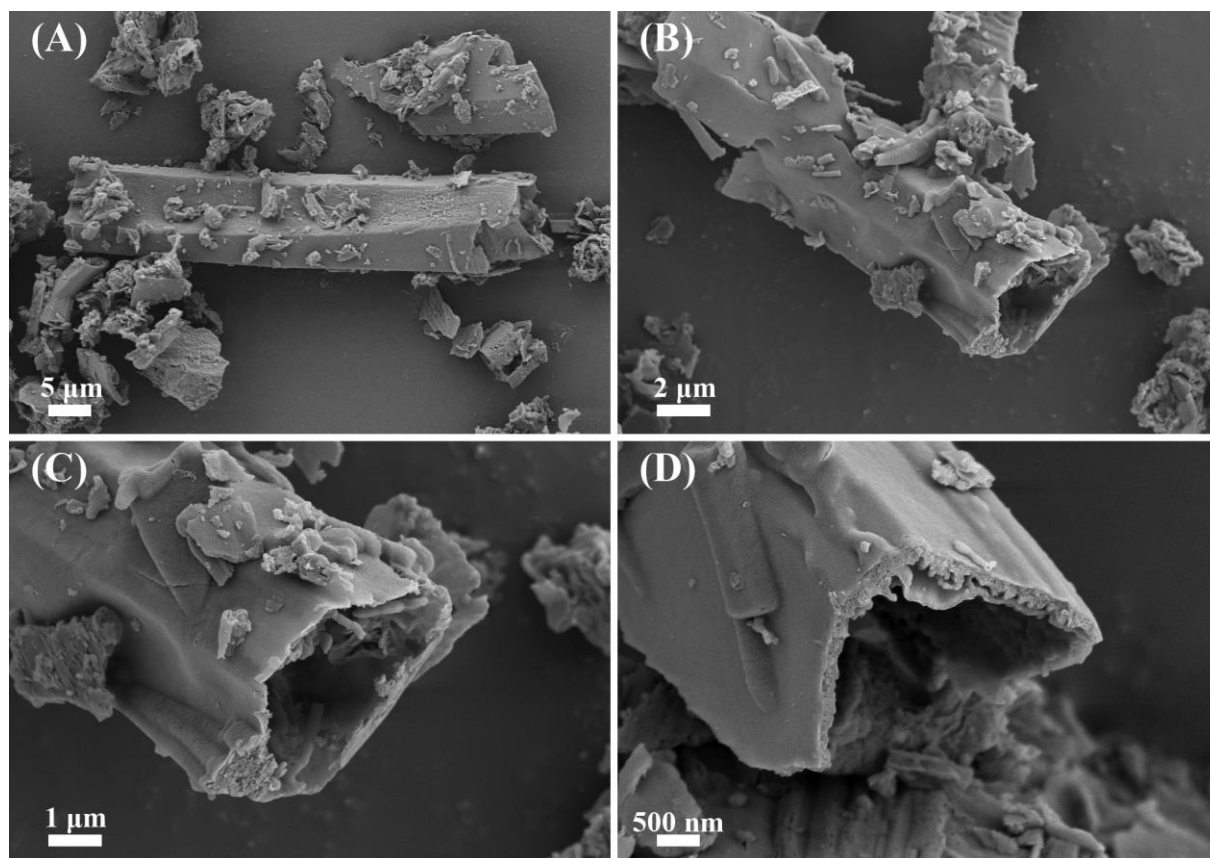

**Figure S6.** SEM images of 1.0-P-HCN after reaction for three cycles.



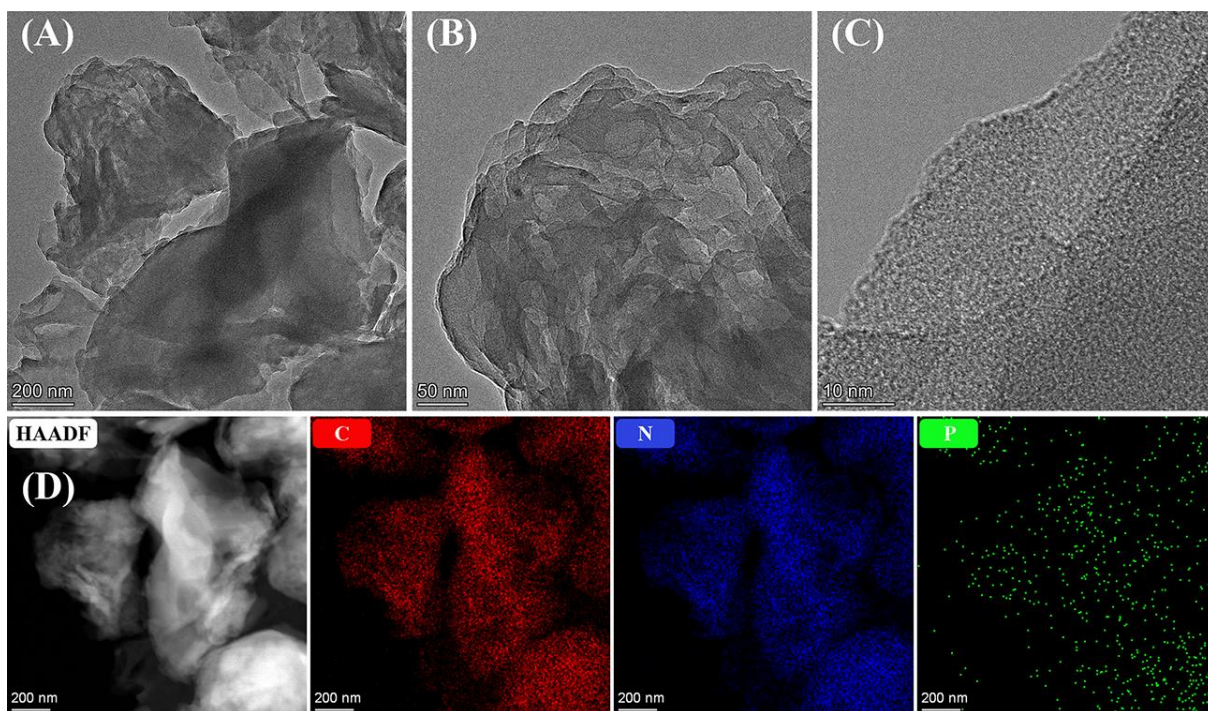

**Figure S7.** TEM images (A, B, C) and EDS elemental mapping (D) of 1.0-P-HCN after reaction for three cycles.



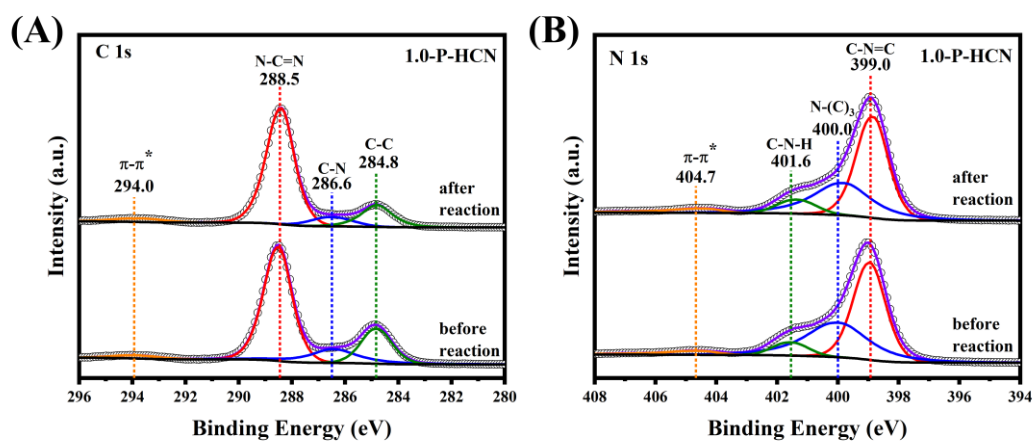

**Figure S8.** XPS spectra of C 1s (A), N 1s (B) of 1.0-P-HCN before and after reaction for three cycles.

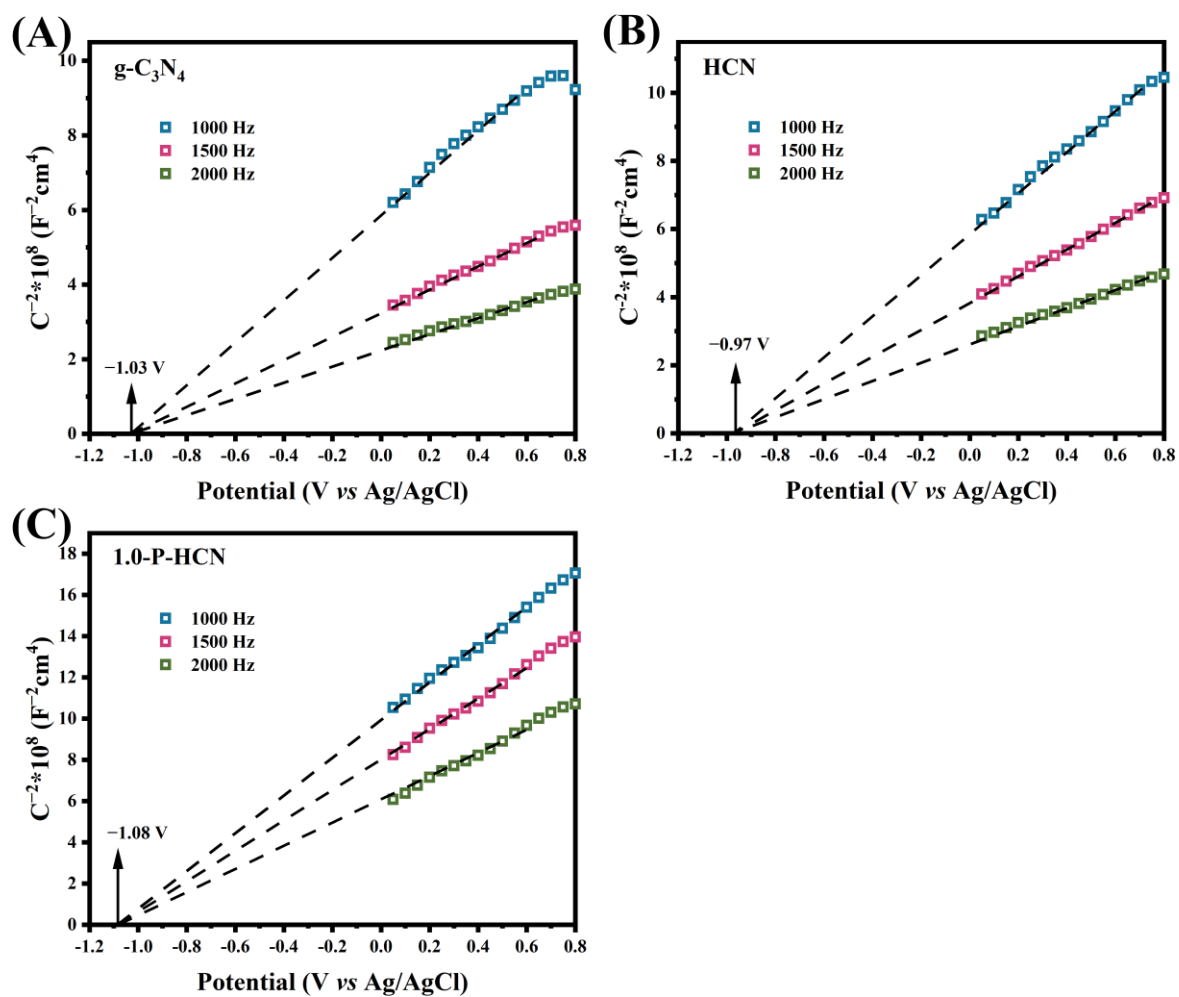

**Figure S9.** Mott-Schottky plots of  $\text{g-C}_3\text{N}_4$  (A), HCN (B), and 1.0-P-HCN (C) at the frequency of 1000 Hz, 1500 Hz, and 2000 Hz.

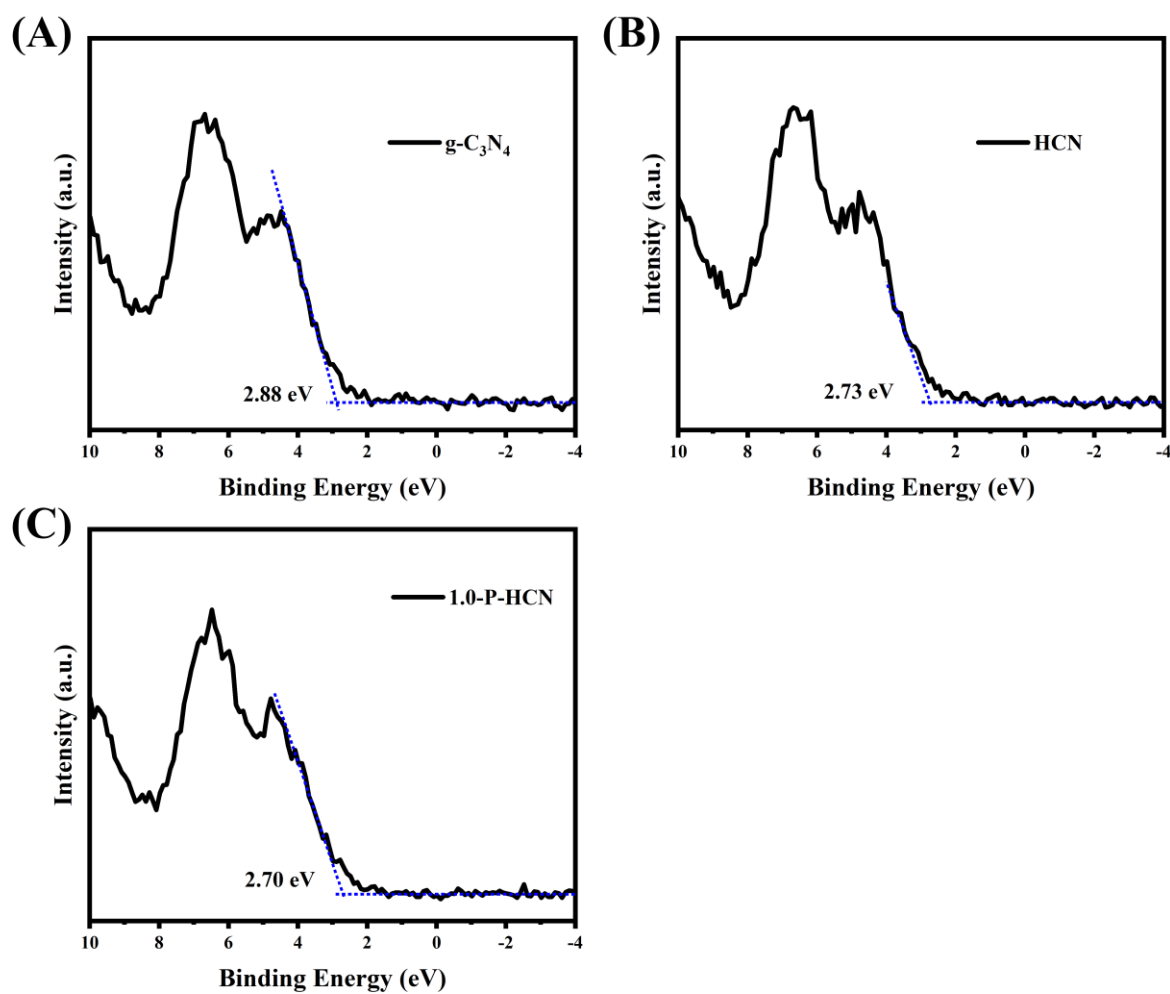

**Figure S10.** XPS valence band spectra of  $g\text{-C}_3\text{N}_4$  (A), HCN (B) and 1.0-P-HCN (C).

**Table S1.** Specific surface area and average pore diameter of g-C<sub>3</sub>N<sub>4</sub>, HCN, and x-P-HCN

| Samples                         | Specific surface Area (m <sup>2</sup> ·g <sup>-1</sup> ) | Average pore diameter (nm) |
|---------------------------------|----------------------------------------------------------|----------------------------|
| g-C <sub>3</sub> N <sub>4</sub> | 6.81                                                     | 16.4                       |
| HCN                             | 7.91                                                     | 15.7                       |
| 0.5-P-HCN                       | 9.61                                                     | 15.3                       |
| 1.0-P-HCN                       | 13.85                                                    | 17.7                       |
| 1.5-P-HCN                       | 17.55                                                    | 17.1                       |
| 2.0-P-HCN                       | 20.01                                                    | 16.3                       |

**Table S2.** Summary of the photocatalytic CO<sub>2</sub> reduction performance over g-C<sub>3</sub>N<sub>4</sub> and phosphorus doped g-C<sub>3</sub>N<sub>4</sub> photocatalysts.

| Photocatalyst                                                   | Yields of products                                                                                                                         | Light source                   | Reaction conditions                                                                        | Ref.      |
|-----------------------------------------------------------------|--------------------------------------------------------------------------------------------------------------------------------------------|--------------------------------|--------------------------------------------------------------------------------------------|-----------|
| g-C <sub>3</sub> N <sub>4</sub>                                 | CO, 0.75 $\mu\text{mol}\cdot\text{g}^{-1}\cdot\text{h}^{-1}$                                                                               | 300 W Xe lamp<br>350 nm-780 nm | CO <sub>2</sub>                                                                            | [1]       |
| TCN                                                             | CO, 3.12 $\mu\text{mol}\cdot\text{g}^{-1}\cdot\text{h}^{-1}$                                                                               |                                |                                                                                            |           |
| TCN-1                                                           | CO, 7.06 $\mu\text{mol}\cdot\text{g}^{-1}\cdot\text{h}^{-1}$                                                                               |                                |                                                                                            |           |
| g-C <sub>3</sub> N <sub>4</sub>                                 | CO, 0.53 $\mu\text{mol}\cdot\text{g}^{-1}\cdot\text{h}^{-1}$                                                                               | 300 W Xe lamp<br>>420 nm       | CO <sub>2</sub><br>H <sub>2</sub> O<br>MeCN<br>TEOA                                        | [2]       |
| CNF-1.2                                                         | CO, 2.9 $\mu\text{mol}\cdot\text{g}^{-1}\cdot\text{h}^{-1}$                                                                                |                                |                                                                                            |           |
| g-C <sub>3</sub> N <sub>4</sub>                                 | CO, 0.76 $\mu\text{mol}\cdot\text{g}^{-1}\cdot\text{h}^{-1}$<br>CH <sub>4</sub> , 0.13 $\mu\text{mol}\cdot\text{g}^{-1}\cdot\text{h}^{-1}$ | 300 W Xe lamp                  | CO <sub>2</sub><br>5 M H <sub>2</sub> SO <sub>4</sub>                                      | [3]       |
| P-g-C <sub>3</sub> N <sub>4</sub>                               | CO, 2.37 $\mu\text{mol}\cdot\text{g}^{-1}\cdot\text{h}^{-1}$<br>CH <sub>4</sub> , 1.81 $\mu\text{mol}\cdot\text{g}^{-1}\cdot\text{h}^{-1}$ |                                |                                                                                            |           |
| g-C <sub>3</sub> N <sub>4</sub>                                 | CO, 1.05 $\mu\text{mol}\cdot\text{g}^{-1}\cdot\text{h}^{-1}$<br>CH <sub>4</sub> , 0.37 $\mu\text{mol}\cdot\text{g}^{-1}\cdot\text{h}^{-1}$ | 300 W Xe lamp                  | CO <sub>2</sub><br>H <sub>2</sub> O vapor                                                  | [4]       |
| g-C <sub>3</sub> N <sub>4</sub> /Ti <sub>3</sub> C <sub>2</sub> | CO, 2.67 $\mu\text{mol}\cdot\text{g}^{-1}\cdot\text{h}^{-1}$<br>CH <sub>4</sub> , 0.66 $\mu\text{mol}\cdot\text{g}^{-1}\cdot\text{h}^{-1}$ |                                |                                                                                            |           |
| g-C <sub>3</sub> N <sub>4</sub>                                 | CO, 0.24 $\mu\text{mol}\cdot\text{g}^{-1}\cdot\text{h}^{-1}$                                                                               | 300 W Xe lamp<br>>420 nm       | CO <sub>2</sub><br>1 wt% HAuCl <sub>4</sub><br>1 M NaHCO <sub>3</sub>                      | [5]       |
| P-doped g-C <sub>3</sub> N <sub>4</sub>                         | CO, 0.38 $\mu\text{mol}\cdot\text{g}^{-1}\cdot\text{h}^{-1}$                                                                               |                                |                                                                                            |           |
| g-C <sub>3</sub> N <sub>4</sub>                                 | CO, 67.01 $\mu\text{mol}\cdot\text{g}^{-1}\cdot\text{h}^{-1}$<br>H <sub>2</sub> , 3.55 $\mu\text{mol}\cdot\text{g}^{-1}\cdot\text{h}^{-1}$ | 500 W Xe lamp                  | CO <sub>2</sub><br>2,2'-bipyridine<br>CoCl <sub>2</sub><br>DMF<br>H <sub>2</sub> O<br>TEOA | [6]       |
| P-g-C <sub>3</sub> N <sub>4</sub>                               | CO, 447.5 $\mu\text{mol}\cdot\text{g}^{-1}\cdot\text{h}^{-1}$<br>H <sub>2</sub> , 16.1 $\mu\text{mol}\cdot\text{g}^{-1}\cdot\text{h}^{-1}$ |                                |                                                                                            |           |
| g-C <sub>3</sub> N <sub>4</sub>                                 | CO, 0.88 $\mu\text{mol}\cdot\text{g}^{-1}\cdot\text{h}^{-1}$                                                                               | 300 W Xe lamp<br>>400 nm       | CO <sub>2</sub><br>H <sub>2</sub> O vapor                                                  | This work |
| HCN                                                             | CO, 2.78 $\mu\text{mol}\cdot\text{g}^{-1}\cdot\text{h}^{-1}$                                                                               |                                |                                                                                            |           |
| 1.0-P-HCN                                                       | CO, 9.00 $\mu\text{mol}\cdot\text{g}^{-1}\cdot\text{h}^{-1}$                                                                               |                                |                                                                                            |           |

## Reference

- [1] Liu, Y. Z.; Zhao, L.; Zeng, X. H.; Xiao, F.; Fang, W.; Du, X.; He, X.; Wang, D. H.; Li, W. X.; Chen, H. Efficient Photocatalytic Reduction of CO<sub>2</sub> by Improving Adsorption Activation and Carrier Utilization Rate through N-Vacancy g-C<sub>3</sub>N<sub>4</sub> Hollow Microtubule. *Mater. Today Energy* **2023**, *31*, 101211.
- [2] Wan, S. P.; Ou, M.; Zhong, Q.; Cai, W. Haloid Acid Induced Carbon Nitride Semiconductors for Enhanced Photocatalytic H<sub>2</sub> Evolution and Reduction of CO<sub>2</sub> under Visible Light. *Carbon* **2018**, *138*, 465-474.
- [3] Liu, B.; Ye, L. Q.; Wang, R.; Yang, J. F.; Zhang, Y. X.; Guan, R.; Tian, L. H.; Chen, X. B. Phosphorus-Doped Graphitic Carbon Nitride Nanotubes with Amino-Rich Surface for Efficient CO<sub>2</sub> Capture, Enhanced Photocatalytic Activity, and Product Selectivity. *ACS Appl. Mater. Interfaces* **2018**, *10*, 4001-4009.
- [4] Liu, W. Z.; Sun, M. X.; Ding, Z. P.; Gao, B. W.; Ding, W. Ti<sub>3</sub>C<sub>2</sub> MXene Embellished g-C<sub>3</sub>N<sub>4</sub> Nanosheets for Improving Photocatalytic Redox Capacity. *J. Alloy. Compd.* **2021**, *877*, 160223.
- [5] Liu, X. L.; Wang, P.; Zhai, H. S.; Zhang, Q. Q.; Huang, B. B.; Wang, Z. Y.; Liu, Y. Y.; Dai, Y.; Qin, X. Y.; Zhang, X. Y. Synthesis of Synergetic Phosphorus and Cyano Groups (Cn) Modified g-C<sub>3</sub>N<sub>4</sub> for Enhanced Photocatalytic H<sub>2</sub> Production and CO<sub>2</sub> Reduction under Visible Light Irradiation. *Appl. Catal. B: Environ.* **2018**, *232*, 521-530.
- [6] Wang, W. F.; Qiu, L. Q.; Chen, K. H.; Li, H. R.; Feng, L. F.; He, L. N. Morphology and Element Doping Effects: Phosphorus-Doped Hollow Polygonal g-C<sub>3</sub>N<sub>4</sub> Rods for Visible Light-Driven CO<sub>2</sub> Reduction. *New J. Chem.* **2022**, *46*, 3017-3025.
